# Supplementary material
Source: PubMed Central journal article supplement (PMC4404302)
Supplement: NIHMS678304-supplement-supplement_1.pdf [file NIHMS678304-supplement-supplement_1.pdf]

## SUPPLEMENTARY FIGURES

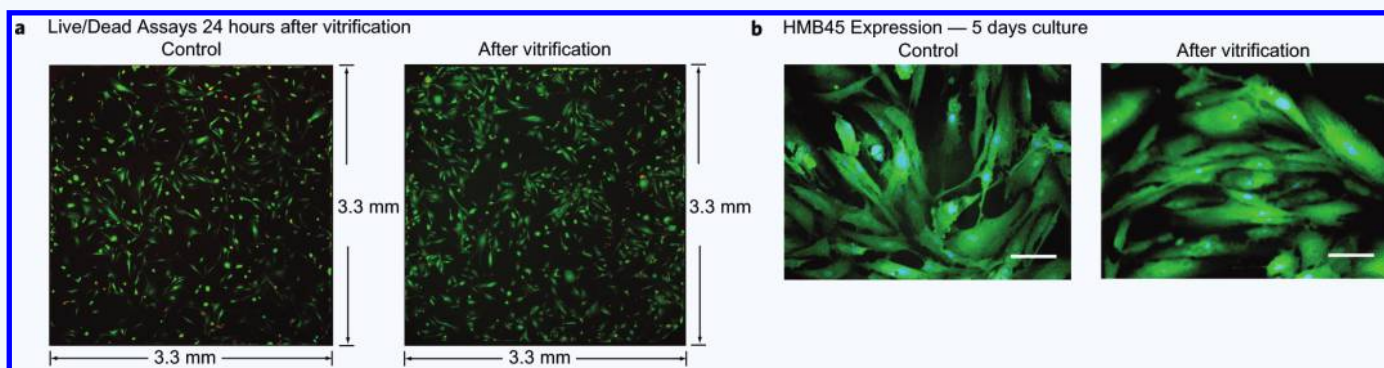

**Supplementary Figure 1** Images of viability and HMB 45 expression. **(a)** Viability of cells from LAM patient pleural effusion at 18 hours after vitrification using 200  $\mu\text{m}(\phi)$ -20  $\mu\text{m}(t)$  fused silica capillary. **(b)** HMB45 expression in cells from a LAM patient pleural effusion. On Day 5 of growth rate experiments, the wells of control and experiment groups were fixed with 4% paraformaldehyde (PFA, Electron Microscopy Sciences) diluted in 1 $\times$  PBS and were permeabilized with 0.2% Triton-X (Sigma) diluted in 1 $\times$  PBS. After the permeabilization solution was removed, the cells were washed with 1 $\times$  PBS and the cell membranes were blocked for 30 minutes in 2% normal goat serum (Vector Laboratories) and 3% bovine serum albumin (Sigma) in 1 $\times$  PBS. Blocking agents were replaced by a primary antibody solution containing a 1:20 dilution of HMB45 antibody in 3% BSA in 1 $\times$  PBS (w/o  $\text{Ca}^{2+}$ ,  $\text{Mg}^{2+}$ ). Following the primary antibody incubation, the patient samples were washed in 1 $\times$  PBS before applying secondary antibodies (AlexaFluor488 IgG1) diluted at 1:500 in 3% bovine serum albumin in 1 $\times$  PBS with 1:500 4', 6-diamidino-2-phenylindole, dihydrochloride (DAPI, Invitrogen) for 1 hour for imaging. Scale bar for 100  $\mu\text{m}$ .

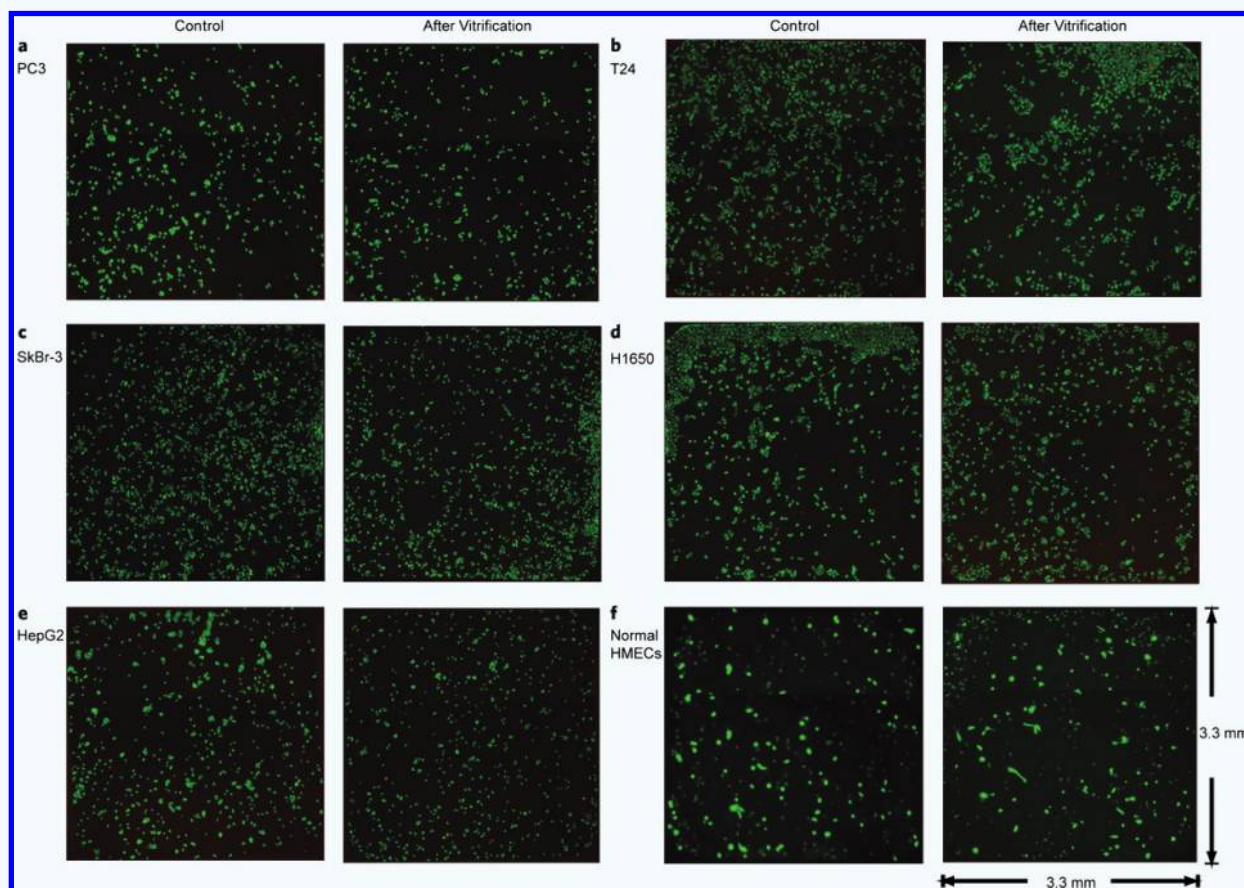

**Supplementary Figure 2** Images of viability after vitrification. Viability images of five cancerous epithelial cell lines **(a-e)**, normal HMECs **(f)** at 12-18 hours after vitrification using 200  $\mu\text{m}(\phi)$ -20  $\mu\text{m}(t)$  fused silica capillary. Entire plate (3.3 mm  $\times$  3.3 mm) images which contain all the cells dispensed from the capillary.
